# Supplementary material
Source: PubMed Central journal article supplement (PMC4533837)

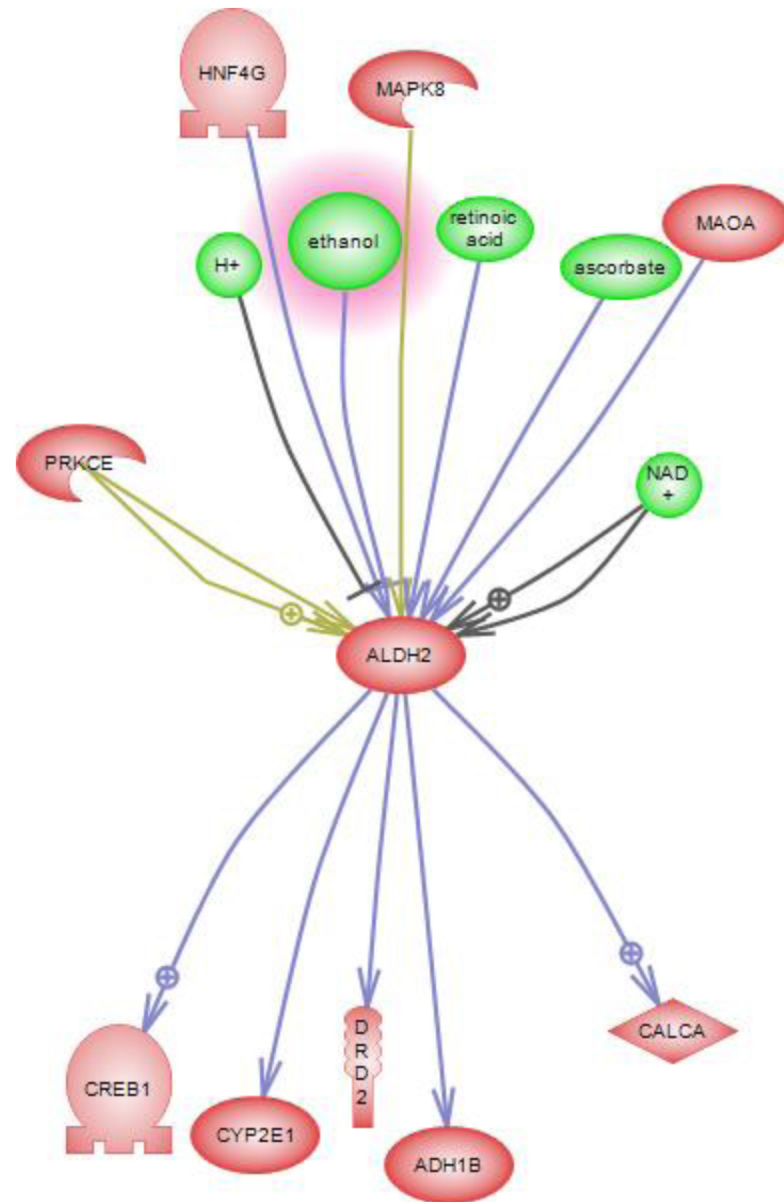

Suppl. Figure 4a.

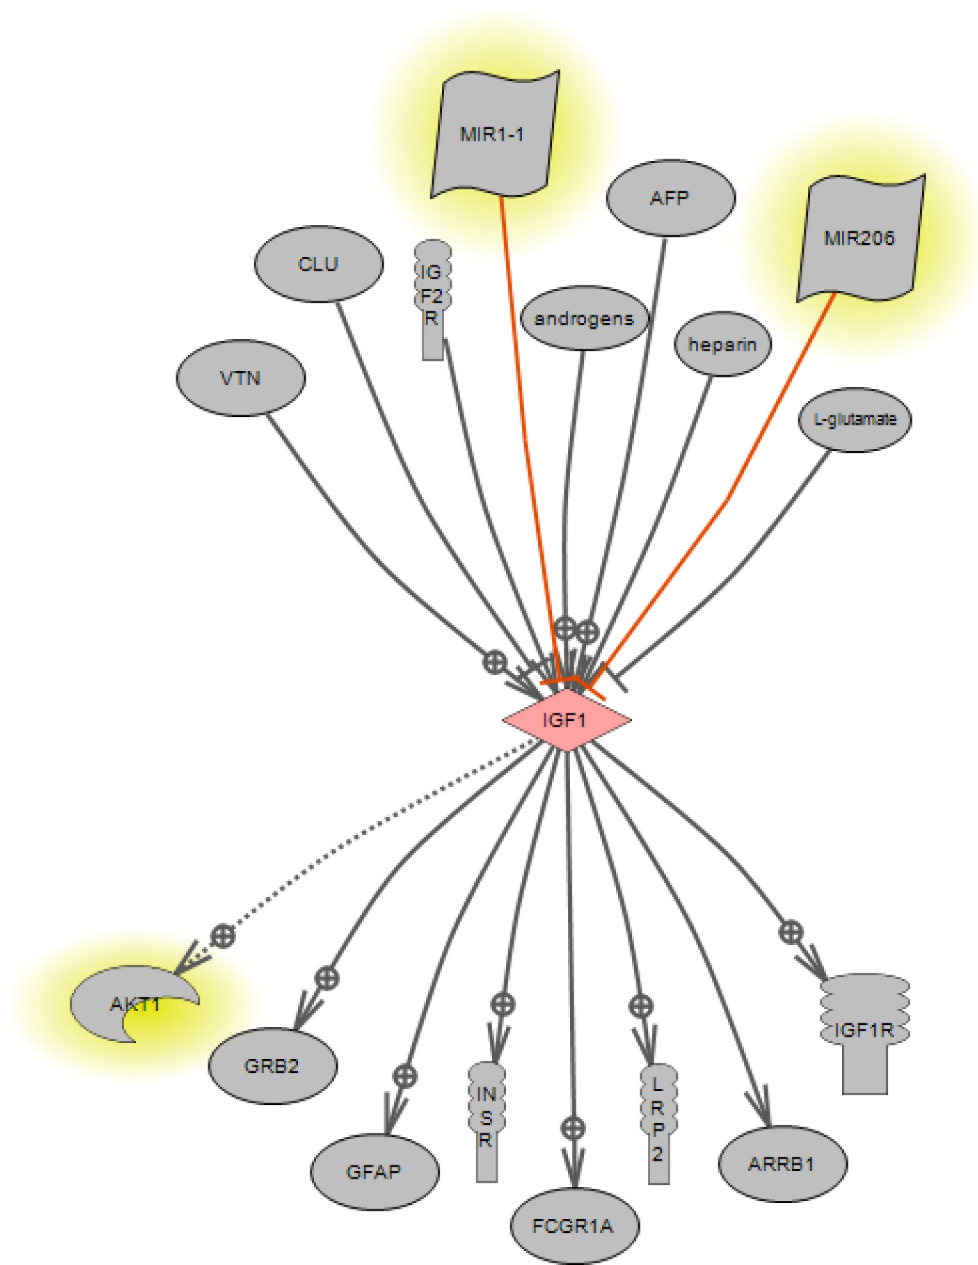

Supp. Figure 4b.

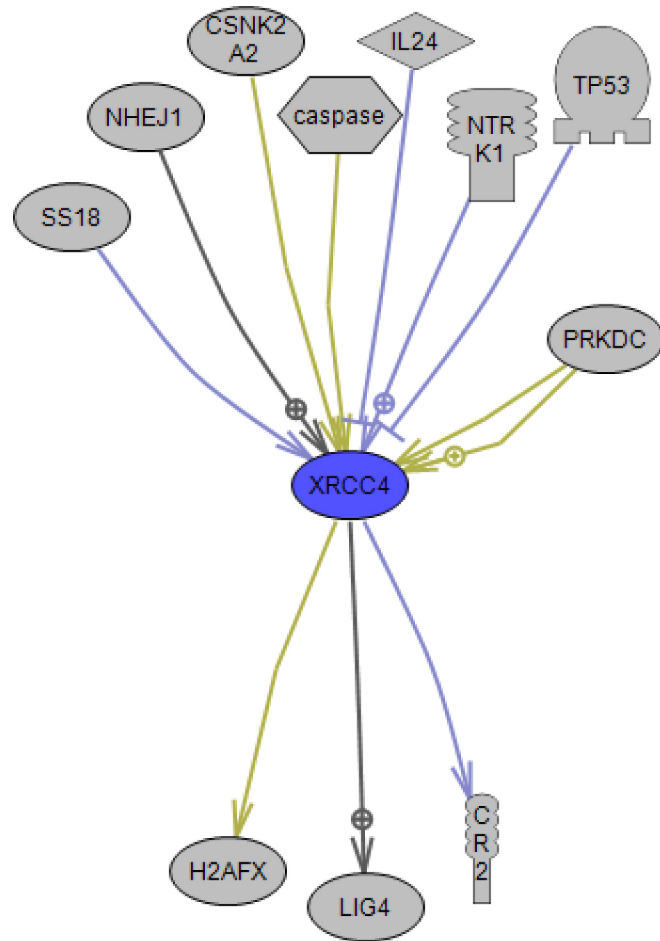

Supp. Figure 4c.

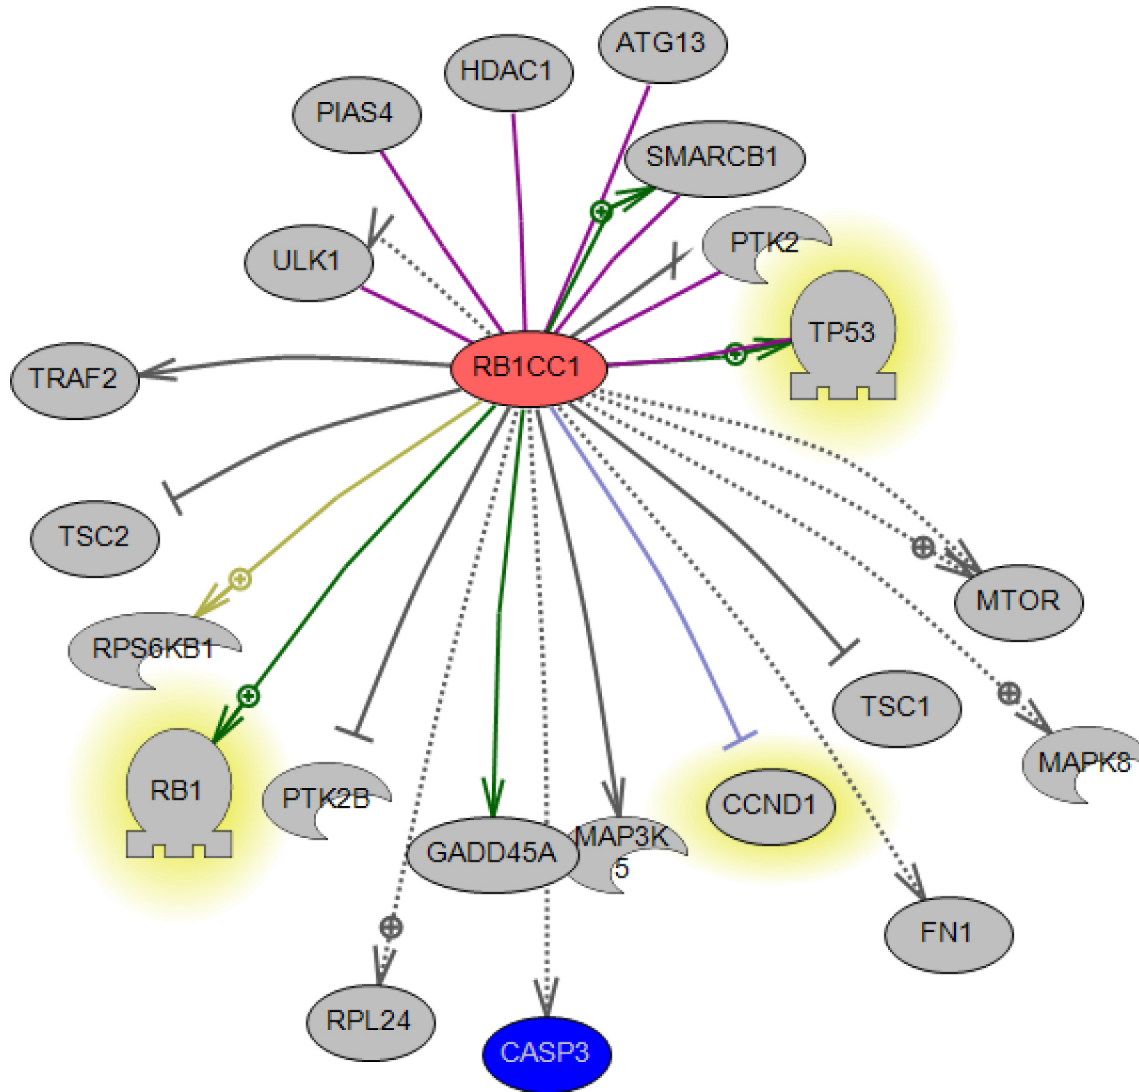

Supp. Figure 4d.

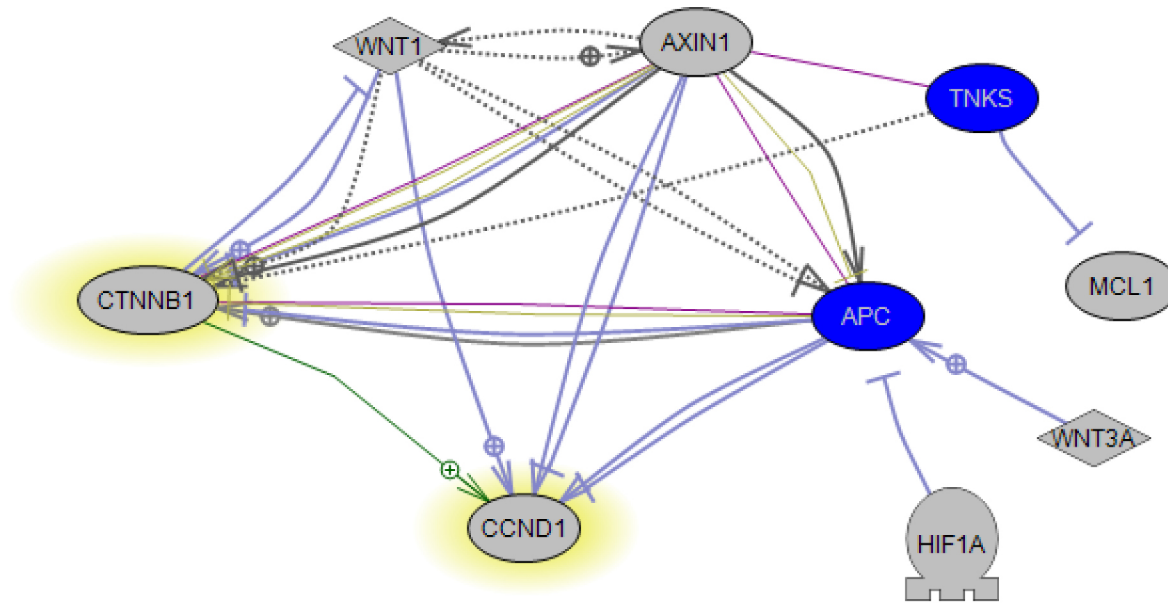

Supp. Figure 4e.

Supplement: NIHMS572763-supplement-Supp_FigS1-S5.pdf [file NIHMS572763-supplement-Supp_FigS1-S5.pdf]
